# Supplementary material for: Specific and highly sensitive spectrofluorimetric method for determination of febuxostat in its tablets and real human plasma. Application to stability studies
Source: Royal Society of Chemistry journal article supplement (doi:10.1039/c6ra11246c), 2016-01-01

**Fig.1.** Effect of volume of 1 M HCl on RFI of FEB (20 ng ml<sup>-1</sup>).

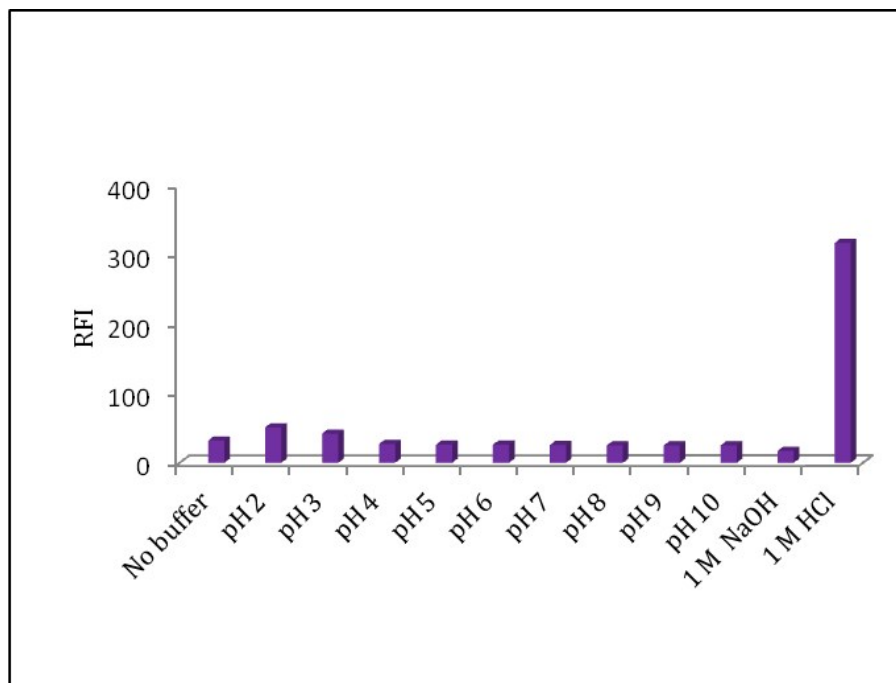

**Fig.2.** Effect of diluting solvent on RFI of FEB (20 ng ml<sup>-1</sup>).

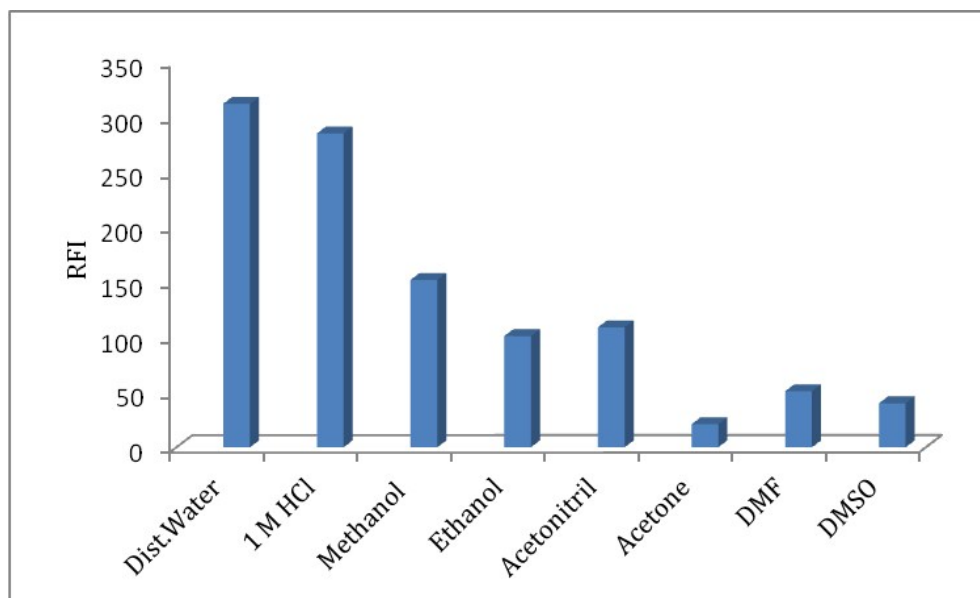

**Fig.3.** Effect of the type of organized media [  $\beta$ -CD (0.2 % w/v ), SDS ( 0.3 % w/v), CTAB (0.2 % w/v) and Tween-80 (0.6 % v/v)] on RFI of FEB (20 ng ml<sup>-1</sup>).

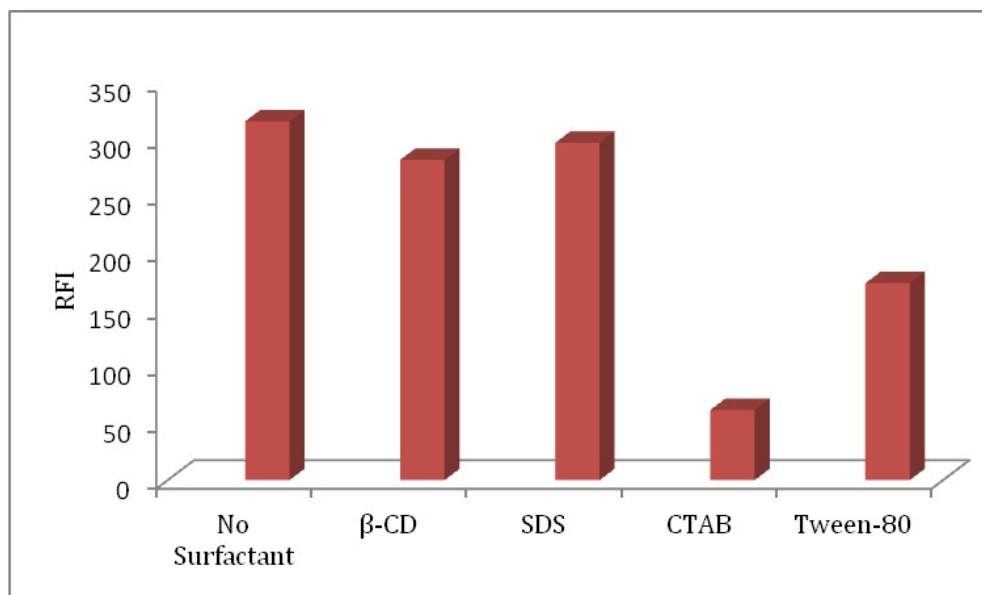

**Fig.4.** Fluorescence spectra of real human plasma containing FEB; ( A and A' ) blank human plasma with 5 ml 1 M HCl, ( B and B' ) human plasma containing 5 ng ml<sup>-1</sup> FEB, where: (A and B) are the excitation spectra and ( A' and B' ) are the emission spectra.

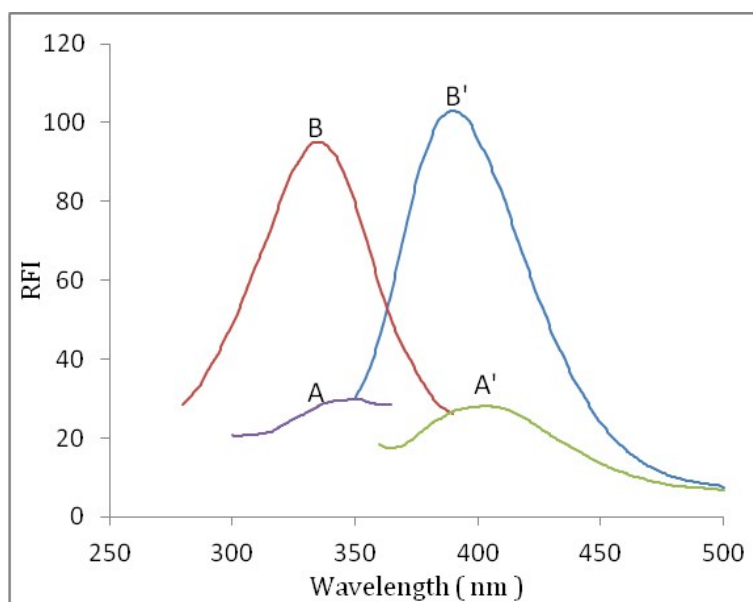

Supplement: c6ra11246c1.pdf [file c6ra11246c1.pdf]
